# Supplementary material
Source: PubMed Central journal article supplement (PMC2872951)
Supplement: supp_109.164541_JHPET164541_part_3_supplemental_material.pdf [file supp_109.164541_JHPET164541_part_3_supplemental_material.pdf]

JPET164541

**A Mouse Model of Severe Halothane Hepatitis Based on  
Human Risk factors**

Christine M. Dugan, Allen E. MacDonald, Robert A. Roth, and Patricia E. Ganey

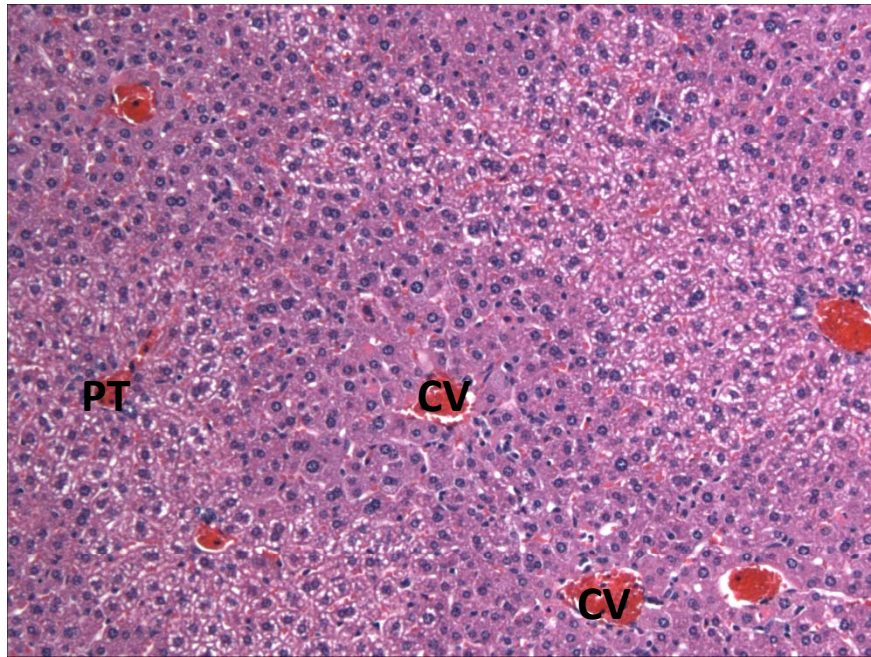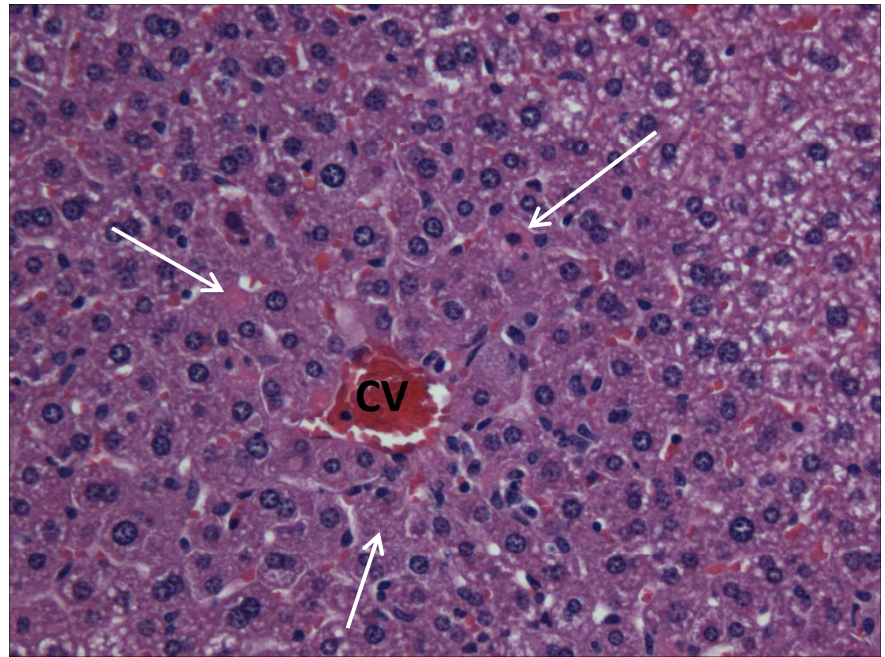

**Figure A. Mild halothane-induced liver injury.** Female mice fed *ad libitum* were treated with halothane (15 mmol/kg; ip), and 24 hrs later liver injury was assessed. H&E-stained section from a mouse with plasma ALT activity of 1,038 U/L demonstrating mild liver damage with centrilobular loss of glycogen and few, scattered necrotic cells (arrows). Panel on left was taken at 100X; panel on right is a portion of the same section taken at 200X. CV, central vein; PT, portal triad.

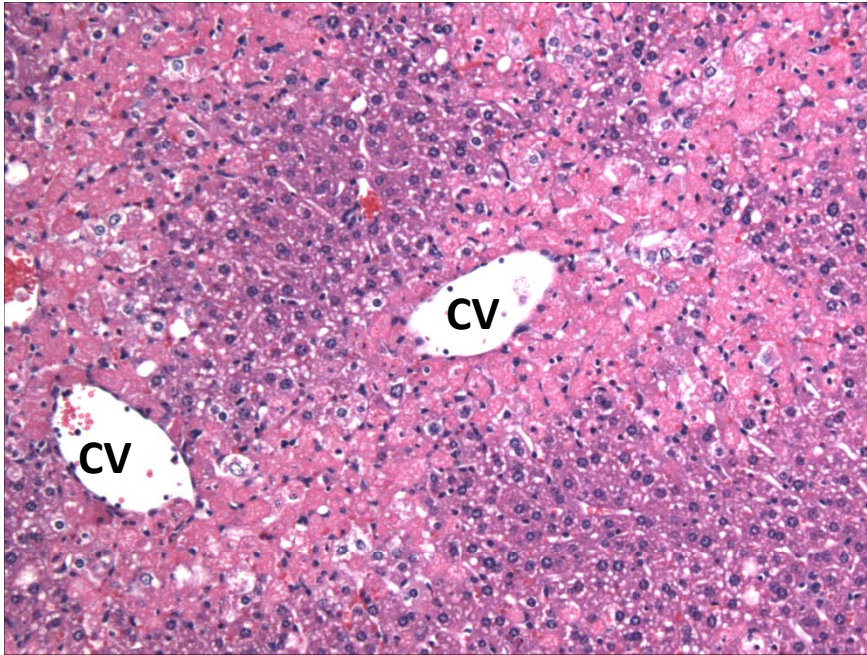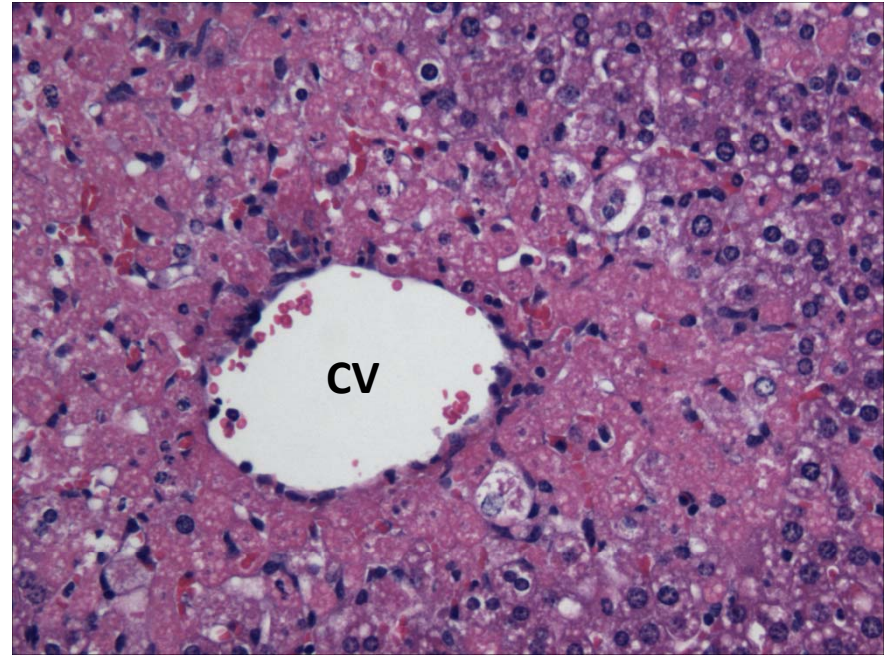

**Figure B. Severe halothane-induced liver injury.** Female mice fed *ad libitum* were treated with halothane (30 mmol/kg; ip), and 24 hrs later liver injury was assessed. H&E-stained section from a mouse with plasma ALT activity of 11,663 U/L demonstrating large areas of bridging necrosis. Panel on left was taken at 100X; panel on right is a portion of the same section taken at 200X. CV, central vein; PT, portal triad.
